1 Blocking the alternative sigma factor RpoN reduces virulence of *Pseudomonas*  
2 *aeruginosa* isolated from cystic fibrosis patients and increases antibiotic sensitivity in a  
3 laboratory strain

4

5 Running Title: Blocking RpoN makes *P. aeruginosa* CF strains avirulent

6

7 Lloyd MG<sup>1</sup>, Vossler JL<sup>2</sup>, Nomura CT<sup>3,4</sup>, Moffat JF<sup>1,#</sup>

8

9 <sup>1</sup>Department of Microbiology and Immunology, SUNY Upstate Medical University,  
10 Syracuse, NY, USA

11

12 <sup>2</sup>Department of Clinical Laboratory Science, SUNY Upstate Medical University,  
13 Syracuse, NY, USA

14

15 <sup>3</sup>Department of Chemistry, SUNY College of Environmental Science and Forestry,  
16 Syracuse, NY, USA

17

18 <sup>4</sup>Center for Applied Microbiology, SUNY College of Environmental Science and  
19 Forestry, Syracuse, NY, USA

20

21 #Address Correspondence to Jennifer F. Moffat

22 Mailing Address: 750 East Adams Street, Syracuse, New York 13210

23 E-mail: moffatj@upstate.edu; Phone: (315) 464-5454

24

25 **Abstract:**

26 Multidrug-resistant organisms (MDROs) are increasing in the health care setting, and  
27 there are few antimicrobial agents available to treat infections caused by these bacteria.  
28 *Pseudomonas aeruginosa* is an opportunistic pathogen in burn patients and individuals  
29 with cystic fibrosis (CF), and a leading cause of nosocomial infections. *P. aeruginosa* is  
30 inherently resistant to many antibiotics and can develop or acquire resistance to others,  
31 limiting options for treatment. *P. aeruginosa* has virulence factors that are regulated by  
32 sigma factors in response to the tissue microenvironment. The alternative sigma factor,  
33 RpoN ( $\sigma^{54}$ ), regulates many virulence genes and is linked to antibiotic resistance.  
34 Recently, we described a cis-acting peptide, RpoN\*, which acts as a “molecular  
35 roadblock”, binding RpoN consensus promoters at the -24 site and blocking  
36 transcription. RpoN\* reduces virulence of *P. aeruginosa* laboratory strains both *in vitro*  
37 and *in vivo*, but its effects in clinical isolates was not known. We investigated the effects  
38 of RpoN\* on phenotypically varied *P. aeruginosa* strains isolated from cystic fibrosis  
39 patients. RpoN\* expression reduced motility, biofilm formation, and pathogenesis in a *P.*  
40 *aeruginosa* – *C. elegans* infection model. RpoN\* expression increased susceptibility to  
41 several beta-lactam based antibiotics in the lab strain *P. aeruginosa* PA19660 *Xen5*.  
42 Here, we show that using a cis-acting peptide to block RpoN consensus promoters has  
43 potential clinical implications in reducing virulence and enhancing the activity of  
44 antibiotics.

45

46 **Introduction:**

47 Multidrug-resistant organisms (MDROs) are an increasing problem in the healthcare  
48 setting. Both Gram-negative and Gram-positive MDROs are prevalent globally (1, 2).  
49 There are few or no antimicrobial agents available for treatment of infections caused by  
50 these bacteria (3). *Pseudomonas aeruginosa*, a Gram-negative, opportunistic pathogen  
51 is a leading cause of nosocomial infections and is associated with infections in burn  
52 patients (4, 5). *P. aeruginosa* is also responsible for colonizing the respiratory tract and  
53 causing chronic infections in individuals with cystic fibrosis (CF) (6). It is the most  
54 common pathogen isolated from individuals with CF, and is a major source of morbidity  
55 and mortality (7-10).

56

57 In CF patients, *P. aeruginosa* undergoes a transformation from a non-mucoid form upon  
58 initial colonization of the lungs to a mucoid form as the disease progresses. This results  
59 in a chronic debilitating pulmonary infection characterized by the overexpression of  
60 alginate. Mucoid strains synthesize large quantities of alginate exopolysaccharide,  
61 enhancing biofilm formation and protecting *P. aeruginosa* from antibiotics or the immune  
62 response (11), possibly through formation of microcolonies (12, 13). While aggressive  
63 prevention regimens have led to a decline in prevalence of *P. aeruginosa* in CF  
64 patients, multidrug resistant strains are still prevalent and occurred in 19.4% of CF  
65 infections in 2015 (14). *P. aeruginosa* is inherently resistant to a number of antibiotics  
66 (15, 16). It can also acquire resistance through exogenous resistance genes via  
67 horizontal gene transfer or mutations (17), limiting available treatment options.  
68 Antimicrobial development is directed toward alternative treatments and novel targets.

69 Promising strategies include enhancing the activity of currently available antibiotics and  
70 decreasing virulence of the bacteria once an infection occurs (18-25).  
71  
72 *P. aeruginosa* virulence is caused by many factors, including production of toxins,  
73 proteases, phospholipases, the presence of pili and flagella, and biofilm formation (26).  
74 This virulence is regulated by a network of transcription factors, such as sigma factors  
75 RpoS and RpoN, and quorum sensing regulators (27). The alternative sigma factor,  $\sigma^{54}$   
76 or RpoN, regulates nitrogen assimilation, quorum sensing, motility, and biofilm formation  
77 (28-33). RpoN regulation was recently linked to *P. aeruginosa* tolerance to several  
78 antibiotics (34-36). RpoN binds to specific promoters with conserved -24, -12  
79 sequences upstream of RpoN-regulated genes throughout the genome and is a key  
80 virulence regulator (37). The specific and conserved nature through which RpoN  
81 controls its regulon led us to develop the RpoN molecular roadblock, RpoN\*. RpoN\* is  
82 a cis-acting peptide that specifically binds the -24 site of RpoN consensus promoters,  
83 blocking transcription by RpoN and other factors (38). When RpoN\* is expressed in *P.*  
84 *aeruginosa* laboratory strains, transcription is affected globally and virulence is  
85 attenuated (38). RpoN\* also affects virulence in an RpoN deletion strain of *P.*  
86 *aeruginosa* PAO1, demonstrating its ability to attenuate gene expression by repressing  
87 expression of genes located downstream of RpoN promoters (38). This strategy of  
88 blocking multiple promoters throughout the *P. aeruginosa* genome may be an effective  
89 method to combat virulence and evade development of resistance.

90

91 *P. aeruginosa* isolated from CF patients are phenotypically and genetically varied (39,  
92 40). Many *P. aeruginosa* clinical isolates have mutations, including deletion or loss of  
93 function, in the *rpoN* gene (41, 42). It was not known how the cis-acting RpoN\* peptide  
94 would affect virulence phenotypes in *P. aeruginosa* clinical isolates, particularly in  
95 strains that do not express or have low levels of RpoN. In this study, we describe the  
96 effects of RpoN\* on *in vitro* and *in vivo* virulence of *P. aeruginosa* isolated from CF  
97 patients and its effects on antibiotic resistance. Expression of RpoN\* reduced virulence-  
98 associated phenotypes in clinical isolates and improved *P. aeruginosa* susceptibility to  
99 multiple antibiotics. This study demonstrates that RpoN\* has potential clinical  
100 applications and potentially represents an effective strategy to combat both antibiotic  
101 resistance and infections with *P. aeruginosa* in CF patients.

102

### 103 **Results:**

104 *Virulence phenotypes were variable in P. aeruginosa isolates from CF patients:*

105 *P. aeruginosa* isolated from different CF patients or within the same CF patient have  
106 varied phenotypes and genotypes (39, 40). *P. aeruginosa* adapts over time, leading to  
107 mutations and changes in expression of genes related to motility, quorum sensing, and  
108 overall virulence (41, 43). To determine the virulence-related phenotypic profiles of the  
109 strains used in this study (Table 1), each *P. aeruginosa* patient isolate was evaluated for  
110 motility and biofilm formation, compared to the positive, virulent control strain *P.*  
111 *aeruginosa* PA19660 Xen5. Several patient isolates were highly motile in the swimming  
112 assay (flagella), including SCH0057-7, SCH0256-1, SCH0354-1 and UUH0201, while  
113 others were nonmotile (Fig 1A). Most strains were motile in the twitching assay (pili) and

114 produced moderate biofilms, with SCH0254-118 migrating the furthest (Fig 1B) and  
115 forming the most extensive biofilm (Fig 1C). SCH0254-116, SCH0397-3, and UUH0202  
116 did not form biofilms.

117  
118 The pathogenesis of patient isolates was evaluated in a *P. aeruginosa* – *C. elegans*  
119 infection model. All patient isolates were compared to *E. coli* OP50, an avirulent  
120 negative control. SCH0057-7 was the most pathogenic in the paralytic killing assay,  
121 which is mediated by hydrogen cyanide production (44, 45) (Fig 2A). Other strains were  
122 moderately pathogenic, including SCH0256-1, SCH0354-1, SCH0397-3, and UUH0202.  
123 SCH0057-7, SCH0338-58, and UUH0202 were highly pathogenic in the slow killing  
124 assay, which mimics establishment and proliferation of an infection and is mediated by  
125 the *lasR*, *gacA*, *lemA*, and *ptsP* genes (46), while UUH0201 was moderately pathogenic  
126 (Fig 2B). As expected, the virulence-associated phenotypes of patient isolates varied  
127 widely *in vitro* and *in vivo*.

128

129 *RpoN* protein levels varied among patient isolates:

130 Others reported that the *rpoN* gene was mutated or lost in approximately 20% of *P.*  
131 *aeruginosa* isolates from CF patients (41). Loss or mutation in the *rpoN* gene can result  
132 in phenotypes similar to those observed in the patient isolates evaluated here (29, 31,  
133 32). Thus, we evaluated relative protein levels of RpoN in these patient isolates by  
134 western blot. RpoN levels were moderately high in the positive control *P. aeruginosa*  
135 PAO1-S, while low or minimal protein levels were detected in the isogenic  $\Delta rpoN$  mutant  
136 negative control (Fig 3). The low level of background in the  $\Delta rpoN$  mutant is likely due to

137 nonspecific antibody binding. RpoN levels varied in the CF patient isolates, with high  
138 levels in SCH0057-7, SCH0397-3, and UUH0201; intermediate levels in SCH0254-116,  
139 SCH0338-58, and UUH0202; and low levels in SCH0254-23, SCH0254-118, SCH0256-  
140 1, SCH0354-1, SCH03269, and UUH0101.

141

142 *RpoN\* expressed in CF patient isolates reduced virulence-associated phenotypes in*  
143 *vitro:*

144 The effect of RpoN\* expression on motility and biofilm formation in patient isolates was  
145 not known. Unfortunately, some patient isolates could not be transformed, and so only  
146 four isolates were evaluated for the effects of RpoN\* expressed from a plasmid.

147 SCH0057-7, SCH0256-1, SCH0338-58, and SCH0354-1 were transformed with a  
148 plasmid expressing RpoN\* or the empty vector and selected with gentamicin. If RpoN\*  
149 affected transcription of virulence-related genes in different genetic backgrounds as  
150 previously reported (38), we expected attenuation of virulence-related phenotypes in *P.*

151 *aeruginosa* CF patient isolates. RpoN\* significantly reduced colony diameter in all four  
152 patient isolates in the swimming motility assay (Student's t-test, \*\*  $p \leq 0.01$ , \*\*\* $p \leq 0.0001$ )

153 (Fig 4A). RpoN\* significantly reduced colony diameter in SCH0057-7, SCH0256-1, and

154 SCH0338-58 in the twitching motility assay (Student's t-test, \*\*  $p \leq 0.01$ , \*\*\* $p \leq 0.0001$ )

155 (Fig 4B). Colony diameter varied widely in SCH0354-1 when RpoN\* was expressed and

156 was always smaller than with empty vector, although the difference was not significant.

157 In the biofilm formation assay, RpoN\* significantly reduced biofilm formation by

158 SCH0057-7 and SCH0256-1 (Student's t-test,  $p \leq 0.0001$ ) (Fig 4C). Thus RpoN\* reduced

159 virulence-associated phenotypes of *P. aeruginosa* isolated from CF patients.

160

161 *RpoN\* expression increased worm survival in P. aeruginosa – C. elegans infection*

162 *model:*

163 Initial evaluation of patient isolates revealed a single *P. aeruginosa* strain, SCH0057-7,

164 that was both transformable and pathogenic in the *P. aeruginosa – C. elegans* infection

165 assay. Therefore, effects of RpoN\* on pathogenesis of SCH0057-7 were evaluated

166 using the paralytic killing assay, which is based on *P. aeruginosa* hydrogen cyanide

167 production and mimics conditions in the CF lung (44, 45). Wild-type *P. aeruginosa*

168 SCH0057-7 was the positive, virulent control and *E. coli* was the negative, avirulent

169 control. The test conditions were *P. aeruginosa* SCH0057-7 expressing RpoN\* or

170 carrying the empty vector plasmid. If RpoN\* affected virulence-related phenotypes in *P.*

171 *aeruginosa* SCH0057-7, then we expected increased survival of *C. elegans*. Wild type

172 SCH0057-7 and with the empty vector killed approximately 80% of *C. elegans* (Fig 5). In

173 contrast, RpoN\* expression significantly increased *C. elegans* survival (Mantel-Cox Log-

174 Rank Test,  $p \leq 0.0001$ ). Thus, RpoN\* expression reduced pathogenesis of a patient

175 isolate in a *P. aeruginosa – C. elegans* infection model.

176

177 *RpoN\* increased antibiotic susceptibility in vitro:*

178 Antibiotic resistance is a problem in CF patients with *P. aeruginosa* infections (47-49).

179 We previously reported that RpoN\* alters transcription of several genes involved in

180 multidrug efflux pumps that confer natural resistance (38). Additionally, RpoN is

181 implicated in tolerance to various classes of antibiotics (34-36). We evaluated the

182 effects of RpoN\* on antibiotic susceptibility using a MicroScan Neg MIC 43 panel. The



183 test conditions were *P. aeruginosa* PA19660 *Xen5* that was mock-transformed, or  
184 transformed with the empty vector or RpoN\* plasmid. We expected that RpoN\* would  
185 improve antibiotic susceptibility of *P. aeruginosa*. In PA19660 *Xen5* mock-transformed  
186 or with the empty vector, antibiotic susceptibility profiles were the same, except for  
187 gentamicin, which increased in the empty vector strain due to the GM<sup>R</sup> selection marker  
188 (data not shown). In PA19660 *Xen5* expressing RpoN\*, susceptibility to five beta-lactam  
189 antibiotics was improved 2- to 4-fold (Fig 6). These were cefotaxime, cefepime, and  
190 ceftazidime (three cephalosporins), piperacillin (a ureidopenicillin), and imipenem (a  
191 carbapenem). Susceptibility to some antibiotics was unchanged (data not shown). The  
192 results demonstrate that RpoN\* expression increased *P. aeruginosa* susceptibility to  
193 several antibiotics.

194

## 195 **Discussion:**

196 Here, we confirm and expand results of previous studies by showing the ability of  
197 RpoN\* to abrogate virulence phenotypes in *P. aeruginosa* isolates from CF patients and  
198 to improve susceptibility to several antibiotics. Our working model of the mechanism of  
199 action of RpoN\* is that it binds the -24 promoter consensus sites, blocking  
200 transactivation by RpoN and other sigma factors. By altering the transcriptome, RpoN\*  
201 reduced virulence in well-characterized laboratory strains (38). Thus, the motivation for  
202 this study was to understand the clinical relevance of RpoN\*. We demonstrated that  
203 RpoN\* expressed in CF patient isolates reduced motility and biofilm formation *in vitro*,  
204 independently of RpoN protein levels. The RpoN\* molecular roadblock protected C.

205 *elegans* from a highly virulent *P. aeruginosa* patient isolate in an *in vivo* infection model.

206 RpoN\* also improved *P. aeruginosa* susceptibility to antibiotics.

207

208 *P. aeruginosa* isolated from CF patients are highly variable (39, 40), with the *rpoN* gene

209 often mutated or lost (41). The patient isolates evaluated in this study had a broad

210 range of motility, biofilm formation, RpoN protein levels, and virulence in *C. elegans*.

211 There was no correspondence between most *in vitro* phenotypes, *in vivo* pathogenesis,

212 and RpoN levels (Fig. S1). The only correlation observed was between twitching or pili-

213 associated motility and biofilm formation (Supplemental Fig 1F,  $p=0.0357$ ,  $R^2=0.37050$ ).

214 Other studies suggested that *in vitro* phenotypes of *P. aeruginosa* isolates can be

215 related to disease status in CF patients (50). Patient information and status of *P.*

216 *aeruginosa* infections is limited for the isolates described here, so a comparison

217 between phenotypes and patient status is not feasible. Interestingly, two isolates,

218 UUH0201 and UUH0202, were obtained five months apart from the same patient, with

219 UUH0201 collected first. The UUH0202 strain was less motile and RpoN protein levels

220 dropped compared to UUH0201, but virulence increased. This supports the concept that

221 *in vitro* phenotypes reflect *P. aeruginosa* infection status in CF patients (50). Further

222 work would be needed to fully elucidate such correlations.

223

224 The RpoN\* molecular roadblock reduced virulence phenotypes in patient isolates with

225 high or low levels of RpoN. For instance, RpoN protein levels were higher in SCH0057-

226 7 than PAO1-S, and RpoN\* reduced flagellar and pili motility, biofilm formation and

227 pathogenesis. In contrast, relative RpoN protein levels were low in SCH0256-1 and

228 SCH0354-1, and yet RpoN\* reduced motility. Thus, the roadblock was effective in the  
229 presence or absence of the native sigma factor. This confirms our previous findings,  
230 which show that RpoN\* reduced virulence in a laboratory strain that was deleted for  
231 *rpoN* (38). Unfortunately, barriers to transformation precluded evaluating RpoN\* in some  
232 of the other clinical isolates. However, the strains that were successfully transformed  
233 represented much of the diversity across the patient isolates.

234

235 The CF patient isolates demonstrated variable pathogenesis in the *C. elegans* paralytic  
236 killing model that spans 6 hours. Only one pathogenic isolate, SCH0057-7, was  
237 transformable and thus possible to evaluate the effects of RpoN\* *in vivo*. This strain  
238 and several others were also pathogenic in the 4-day slow killing assay, but this assay  
239 was not used to evaluate RpoN\* because of difficulty maintaining the plasmid and  
240 RpoN\* expression. Gentamicin selection and IPTG induction are not durable, we found  
241 (38), because the *C. elegans* cuticle is impermeable and the compounds are poorly  
242 absorbed in the intestine (51). While it is expected that expressing RpoN\* in CF  
243 isolates would improve *C. elegans* survival in the slow killing assay, it is not feasible  
244 with the current vector. If issues with maintaining the plasmid and expression of the  
245 roadblock were resolved, it would be interesting to evaluate RpoN\* in this assay using  
246 patient isolates.

247

248 The molecular roadblock, RpoN\*, binds numerous promoters in bacterial genomes,  
249 altering the transcriptome. RpoN\* expression in *P. aeruginosa* greatly reduced  
250 transcription of the *mex* family genes (38), which are involved in multidrug efflux pumps

251 (20). Increased expression of *mex* genes is linked to increased resistance to antibiotics  
252 (17). Therefore, we investigated whether RpoN\* alters *P. aeruginosa* susceptibility to  
253 antibiotics. We employed a clinical laboratory assay for testing bacterial susceptibility or  
254 resistance to antibiotics, and found that RpoN\* improved antibiotic susceptibility at least  
255 two-fold for five different antibiotics, including imipenem. This agrees with work by  
256 others that showed RpoN is involved in *P. aeruginosa* tolerance of carbapenems,  
257 quinolones, and tobramycin (34-36). Unfortunately, the commercial assay uses pre-  
258 determined antibiotic concentrations in a 96-well plate, limiting the scope of the  
259 molecular roadblock's effects. Additionally, the *P. aeruginosa* strain used here is  
260 sensitive to quinolones and tobramycin, so the effects of RpoN\* expression on  
261 resistance to these antibiotics was not evaluated. It will be important to test clinical  
262 strains that are resistant to quinolones, carbapenems, and tobramycin to determine the  
263 effects of RpoN\*. Further studies are needed to uncover the full spectrum of RpoN\*  
264 effects on antibiotic susceptibility.

265

266 Multi-drug resistant organisms (MRDOs) are increasing worldwide, even those with  
267 resistance to entire classes of antibiotics. Alarming, nearly all antibiotics brought to  
268 market in the past 30 years are variations on existing drugs (52). Research into  
269 alternative strategies to treat bacterial infections is a priority, including compounds to  
270 enhance the activity of existing antibiotics or neutralize virulence factors. The molecular  
271 roadblock falls into the latter type. RpoN\* binds consensus promoters throughout the *P.*  
272 *aeruginosa* genome, affecting the transcription of numerous virulence factors. Due to  
273 the many binding sites for RpoN\*, it is unlikely antibiotic resistance will develop during

274 treatment. The binding sequence of the RpoN consensus promoter is conserved across  
275 gram-negative and gram-positive bacteria (36, 37). We explored the effects of RpoN\*  
276 on virulence phenotypes of *Pseudomonas putida*, *Burkholderia cepacia*, and  
277 *Escherichia coli* (unpublished data), suggesting that RpoN\* may reduce virulence in  
278 multiple organisms. More studies are needed to identify the spectrum of RpoN\* activity  
279 and its resistance frequency. Currently, the molecular roadblock is a tool for  
280 antimicrobial development and is not a usable drug. However, a small molecule that  
281 works in the same cis-acting manner as RpoN\* would be an effective, clinically relevant  
282 strategy to combat *P. aeruginosa* virulence and antibiotic resistance.

283

## 284 **Materials and Methods:**

### 285 *Bacteria and Nematodes:*

286 *P. aeruginosa* clinical isolates were provided by the Seattle Children's Hospital (SCH  
287 strains) and Upstate University Hospital (UUH strains). *P. aeruginosa* PAO1-M was  
288 provided by C. Manoil (44), and *P. aeruginosa* PAO1-S and  $\Delta rpoN$  were provided by D.  
289 Haas (31). *P. aeruginosa* PA19660 *Xen5* was purchased from PerkinElmer. *E. coli*  
290 OP50 was provided by D. Pruyne (SUNY Upstate Medical University). All strains are  
291 listed in Table 1. For long-term storage, bacteria were grown overnight in LB broth at  
292 37°C with shaking, and frozen in 10% glycerol at -80°C. *Caenorhabditis elegans* N2 was  
293 purchased from the *Caenorhabditis* Genetics Center (University of Minnesota,  
294 Minneapolis, MN), and maintained on nematode growth media (NGM) seeded with *E.*  
295 *coli* OP50 at 20°C (53). Populations were synchronized via egg lay and grown to the  
296 young adult stage at 20°C (54).

297

298 *Plasmids:*

299 RpoN\* and empty vector plasmids were previously described (38). Plasmids were  
300 maintained in *E. coli* INV110 (Invitrogen) with gentamicin selection (30 mg/L). RpoN\*  
301 expression was induced with isopropyl  $\beta$ -D-1-thiogalactopyranoside (IPTG, 1 mM).

302

303 *Transformation:*

304 Permissive *P. aeruginosa* patient isolates were transformed by electroporation prior to  
305 all experiments, per standard protocol (55). Transformed bacteria were selected on LB  
306 agar or BHI agar supplemented with gentamicin (30 mg/L). Individual colonies were  
307 picked for each assay.

308

309 *Western Blot Analysis:*

310 Overnight bacteria cultures were treated with Cell Lytic B Lysis Reagent (Sigma) to  
311 generate crude cell lysates. The soluble protein fraction was separated on 10% Mini-  
312 PROTEAN<sup>®</sup> TGX Stain-Free<sup>™</sup> protein gels (BioRad), activated for 5 minutes with UV  
313 light, imaged and transferred via semi-dry apparatus to a PVDF membrane. Membranes  
314 were incubated with primary antibody specific for *E. coli* RNA  $\sigma^{54}$  (1:500, BioLegend)  
315 overnight, then with secondary antibody HRP goat anti-mouse (1:10,000, Jackson  
316 ImmunoResearch). The chemiluminescent signal was generated with the Pierce  
317 SuperSignal West Femto substrate kit (Thermo Scientific), and detected with  
318 ChemiDoc<sup>™</sup> MP Imaging System (Bio-Rad Laboratories). Protein bands and total

319 protein per lane were measured with Image Lab (Version 5.2.1; Bio-Rad Laboratories).  
320 RpoN bands were then compared to corresponding total detected protein in each lane.

321

### 322 *Phenotyping Assays:*

323 Assays to measure swimming, twitching (56), and biofilm formation (57), were  
324 conducted according to standard protocols. Transformed *P. aeruginosa* clinical isolates  
325 were grown in appropriate media supplemented with gentamicin (30 mg/L), and with or  
326 without IPTG (1 mM). Motility assay and microtiter plate biofilm assay were conducted  
327 at 37°C for 24h. Images of motility assays were obtained with IVIS-50™ (Perkin Elmer)  
328 and colony diameter was measured with Living Image software (Perkin Elmer). Biofilms  
329 were stained with 0.1% crystal violet, extracted in 95% ethanol, and absorbance was  
330 measured at 550 nm with a  $\mu$ Quant microplate spectrophotometer (BioTek).

331

### 332 *P. aeruginosa – C. elegans infection assays:*

333 For the paralytic killing assay, laboratory strains, clinical isolates, or transformed *P.*  
334 *aeruginosa* were spread on Brain Heart Infusion (BHI) agar (Difco) with, when  
335 applicable, gentamicin (30 mg/L) and with or without IPTG (1 mM). *E. coli* was spread  
336 on BHI agar. All plates were grown overnight at 37°C. Bacteria colonies were swabbed  
337 onto BHI agar, supplemented with gentamicin and/or IPTG (1 mM) when applicable,  
338 and grown at 37°C for 24 h (44). Adult *C. elegans* were added to plates and the assay  
339 was conducted at room temperature, per standard protocol (44). For the slow killing  
340 assay, laboratory strains or clinical isolates of *P. aeruginosa* were grown overnight in LB  
341 broth at 37°C with shaking, and cultures were spread on a modified NGM agar (0.35%

342 bactopectone, 2% bactoagar) (58). Plates were incubated at 37°C for 24 h, then at  
343 room temperature for an additional 24 h. The assay was conducted at 20°C, and worms  
344 were scored every 24 h per standard protocol (58).

345

346 *Antibiotic Sensitivity Testing:*

347 Transformed or mock transformed bacteria were grown overnight in LB broth with  
348 gentamicin (30 mg/L) and IPTG (1 mM) or only IPTG (1 mM), respectively. MicroScan  
349 Neg MIC 43 panels (Beckman Coulter Inc., Brea, CA) were used. Panels were set up  
350 per manufacturer's protocol (MicroScan Gram Negative Procedure Manual, version  
351 09/2016) using the RENOX system (Beckman Coulter Inc., Brea, CA) with a final well  
352 concentration of 3-7x10<sup>5</sup> CFU/mL. The following modifications were made to the  
353 manufacturer's protocol: LB broth supplemented with IPTG (1 mM) and with or without  
354 gentamicin (30 mg/L) was used in place of saline for whole panel. Plates were  
355 incubated at 35°C for 16-20 h, and read using a MicroScan autoSCAN-4 (Beckman  
356 Coulter Inc, Brea, CA). Quality control was performed on the panels per manufacturer's  
357 protocol.

358

359 *Statistics:*

360 Data were analyzed using Excel and GraphPad Prism with a significance of  $p \leq 0.05$   
361 (Microsoft, Washington; GraphPad Software Inc., California).

362

363 *Data Availability:*



364 The datasets produced for the current study are included in this manuscript or are  
365 available from the corresponding author upon reasonable request.

366

### 367 **Acknowledgements**

368 This work was supported by the NIH (CTN: 2R15GM104880) and by the Hill  
369 Collaboration [58482 to JFM and CTN]. The funders had no role in study  
370 design, data collection and interpretation, or the decision to submit the work for  
371 publication. *C. elegans* strains were provided by the CGC, which is funded by NIH  
372 Office of Research Infrastructure Programs (P40 OD010440). We would like to thank  
373 the Clinical Microbiology Lab at the Syracuse VA Medical Center in Syracuse, NY for  
374 supplying the antibiotic susceptibility testing panels and for use of their facility for  
375 reading the results. We would also like to thank Dr. Ran Anbar and Donna Linder at the  
376 Golisano Center at Upstate University Hospital and Marcella Blackledge and Dr. Rafael  
377 Hernandez at the Seattle Children's Hospital for supplying the *P. aeruginosa* CF patient  
378 isolates (Seattle Children's' Hospital CF patient isolates obtained under NIH P30  
379 DK089507).

380

### 381 **Competing Financial Interests:**

382 The authors declare no competing financial interests.

383

### 384 **Author Contributions:**

385 M.G.L. wrote the manuscript. C.T.N. and J.F.M. conceived the study. M.G.L. and J.L.V.  
386 conducted the experiments. M.G.L. generated the figures. All authors reviewed the  
387 manuscript.

388

389 **Figure Captions:**

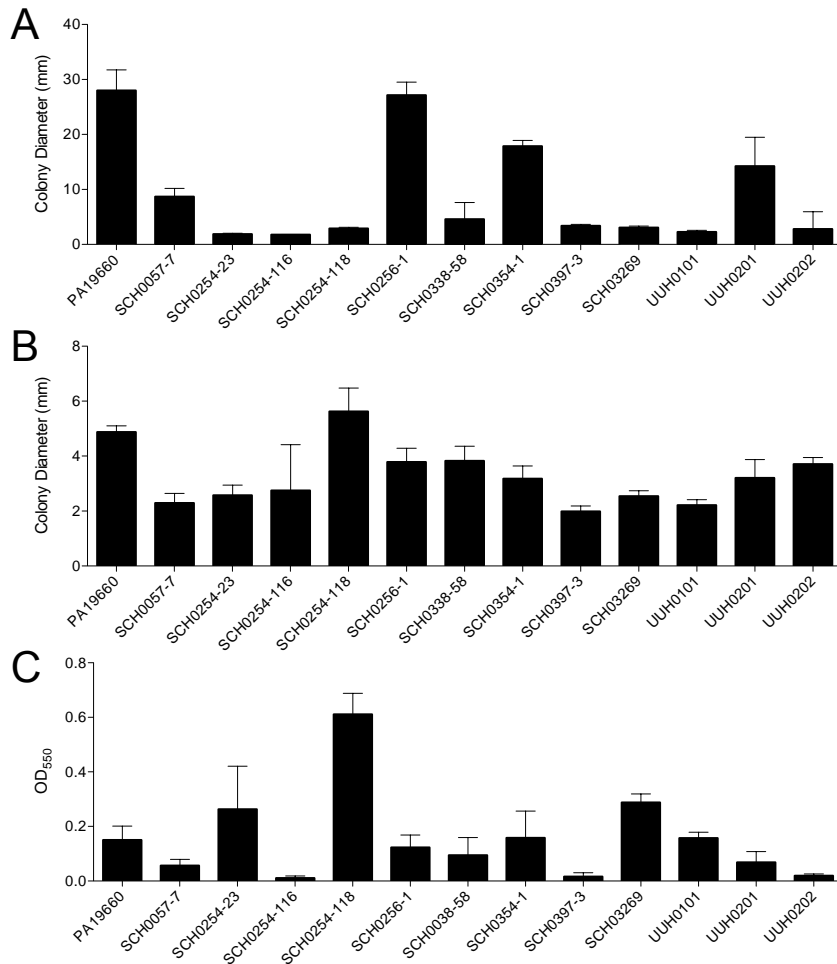

390

391 **Figure 1. Characterization of virulence phenotypes of *P. aeruginosa* strains**

392 **isolated from cystic fibrosis patients. *P. aeruginosa* CF patient isolates were**

393 compared to laboratory strain PA19660 *Xen5*. All assays were conducted at 37°C for

394 24 h. (A) Colony diameter of swimming, or flagellar, motility assay conducted on soft

395 (0.3%) agar. (B) Twitching, or pili, motility assay conducted on semi-hard (1.3%) agar.

396 Colony diameter was measured across point of inoculation to the edges of bacteria

397 colony. (C) Biofilm formation assay was conducted in 96-well microtiter plates. Biofilms

398 were stained with crystal violet (0.1%), solubilized in ethanol (95%), and absorbance

399 measured at OD<sub>550</sub>. Bars are the mean  $\pm$  SD; n = 5 to 6 replicates in motility assays and  
400 n = 10 in biofilm assay. Each assay was performed at least three separate times and  
401 representative results are shown.  
402

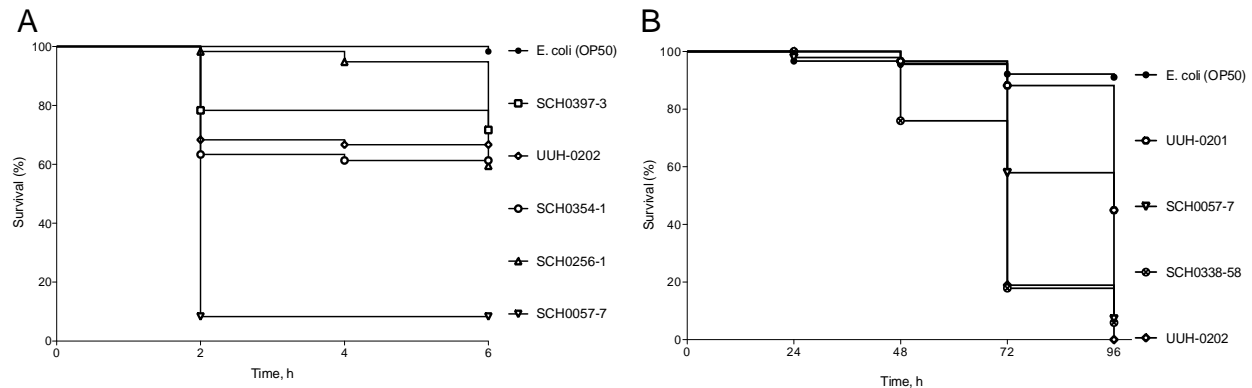

403  
404 **Figure 2. Pathogenesis of *P. aeruginosa* isolated from cystic fibrosis patients in**  
405 ***P. aeruginosa* – *C. elegans* infection model.** Kaplan-Meier survival curves for *P.*  
406 *aeruginosa* – *C. elegans* infection assays. (A) Paralytic killing assay on BHI agar. Assay  
407 was conducted at room temperature and worm status scored every 2 h. (B) Slow killing  
408 assay on modified NGM agar (0.35% bactopectone, 2% bactoagar). Assay was  
409 conducted at 20°C and worm status scored every 24 h. Strains used included CF  
410 patient isolates, and *E. coli* for reference. n = 48 to 90 worms per strain.

411

412

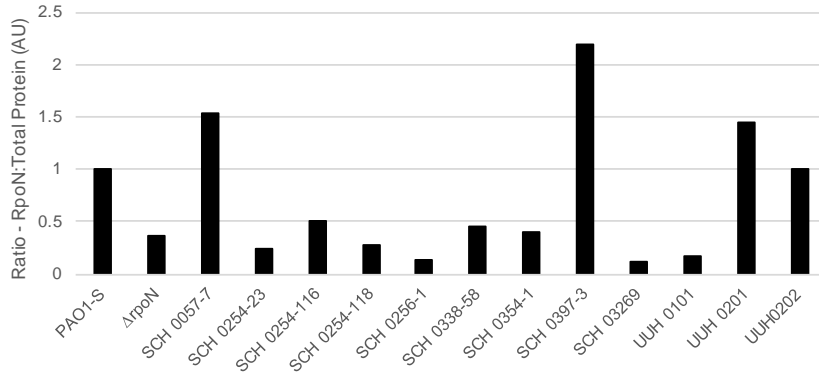

413

414 **Figure 3. RpoN protein in *P. aeruginosa* isolates is highly varied.** Immunoblot  
415 analysis of RpoN expression in *P. aeruginosa* CF patient isolates and laboratory strains  
416 PAO1-S and  $\Delta rpoN$ . Immunoblots performed on 10% Mini-PROTEAN® TGX Stain-  
417 Free™ gels (BioRad). RpoN protein levels were calculated by comparing measured  
418 total protein in each lane to the measured RpoN band (presented as arbitrary units  
419 (AU)). Values were normalized against PAO1-S. This graph is representative of  
420 immunoblots from multiple bacterial cultures and western blot analyses.

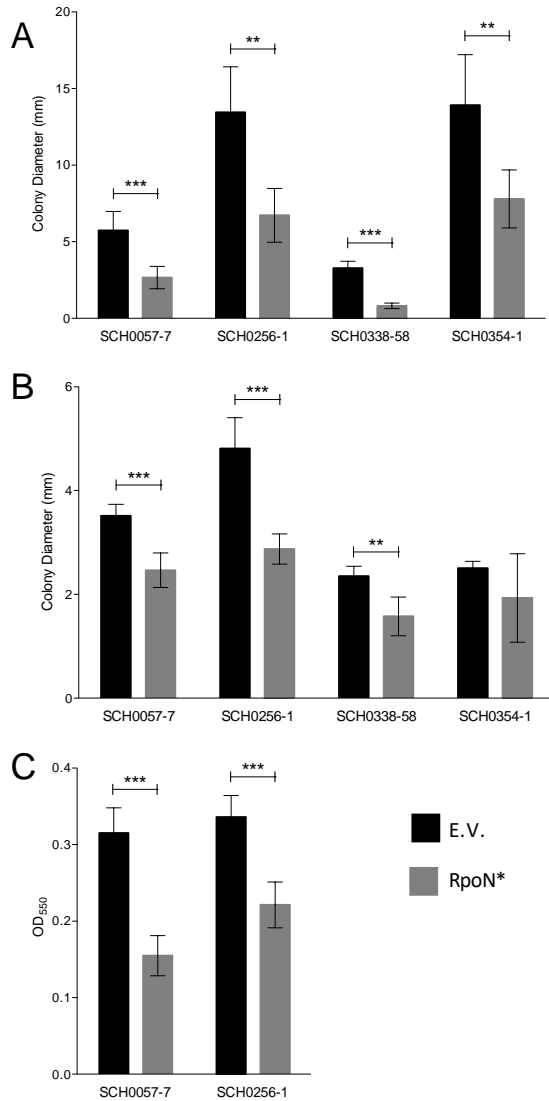

421

422 **Figure 4. RpoN\* expression decreases motility and biofilm formation. P.**

423 *aeruginosa* CF patient isolates with empty vector (E.V., black bars), or with RpoN\*-  
424 expression vector (gray bars). Media was supplemented with gentamicin (30 mg/L), and  
425 IPTG (1 mM) when applicable, and all assays were conducted at 37°C for 24 h. (A)  
426 Colony diameter of swimming, or flagellar, motility assay conducted on soft (0.3%) agar.  
427 (B) Colony diameter of twitching, or pili, motility assay conducted on semi-hard (1.3%)  
428 agar. (C) Biofilm formation assay conducted in 96-well microtiter plates. Bars are the

429 mean  $\pm$  SD (Student's t-test, \*\*\*  $p \leq 0.0001$ ; \*\*  $p \leq 0.01$ ).  $n = 4$  to 5 replicates in motility  
430 assays;  $n = 12$  in biofilm assays.

431

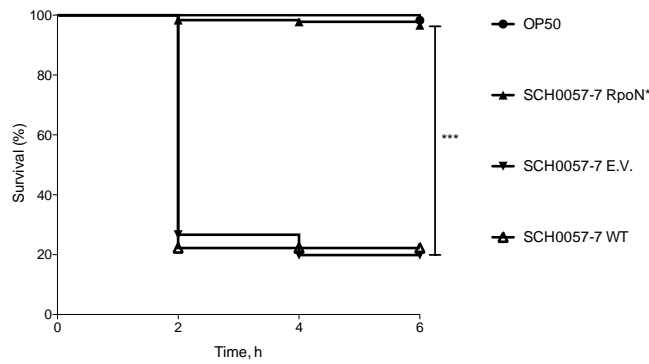

432

433 **Figure 5. RpoN\* promotes *C. elegans* survival in paralytic killing assay.**

434 *P. aeruginosa* CF isolate SCH0057-7 wild type, with empty vector (E.V.), or with RpoN\*-  
435 expression vector, were compared to avirulent *E. coli* OP50. Paralytic killing assay was  
436 conducted on BHI agar supplemented with gentamicin (30 mg/L) and IPTG (1 mM),  
437 when applicable. Assay was conducted at room temperature, and worm status scored  
438 every 2 h. Kaplan-Meier survival curves represent combined survival of three separate  
439 assays (exception: *E. coli*). Mantel-Cox log-rank test was used to analyze E.V. and  
440 RpoN\* curves (\*\*\*  $p \leq 0.0001$ ).  $n = 180$  worms per SCH0057-7 condition,  $n = 60$  worms  
441 for *E. coli*.

442

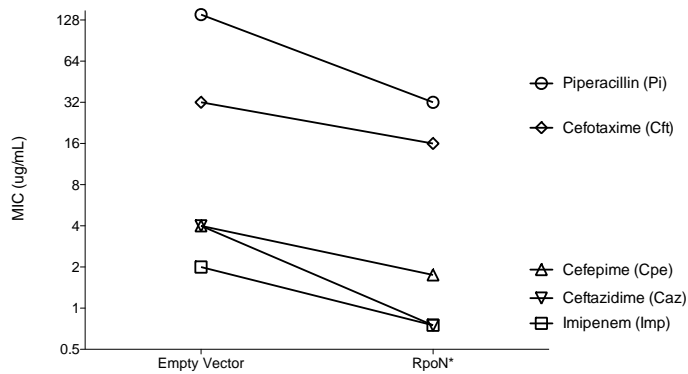

443

444 **Figure 6. RpoN\* expression increases susceptibility to antibiotics.** Overnight  
445 cultures of *P. aeruginosa* PA19660 Xen5 with empty vector or expressing RpoN\*, were  
446 diluted in fresh LB broth, added to wells of MicroScan Neg MIC 43 panel, and incubated  
447 at 35°C for 16-20 h. Media was supplemented with gentamicin (30 mg/L) and IPTG (1  
448 mM). Each point is the average of two biological replicates per experiment and the data  
449 shown are representative of three separate experiments.

450



451 **Table 1. *P. aeruginosa* strains used in this study.**

| Location                                 | Strain       | Source     | CF mutations      | Reference      |
|------------------------------------------|--------------|------------|-------------------|----------------|
| <u>Laboratory</u>                        |              |            |                   |                |
|                                          | PAO1-M       | ---        | n/a               | C. Manoil (27) |
|                                          | PAO1-S       | ---        | n/a               | D. Haas (15)   |
|                                          | <i>ΔrpoN</i> | ---        | n/a               | D. Haas (15)   |
|                                          | PA19660 Xen5 | Septicemia | n/a               | Perkin Elmer   |
| <u>Clinical Isolate</u>                  |              |            |                   |                |
| <i>Seattle Children's Hospital (SCH)</i> |              |            |                   |                |
|                                          | SCH0057-7    | unknown    | ΔF508 / ΔF508     | This study     |
|                                          | SCH0254-23   | unknown    | ΔF508 / unknown   | This study     |
|                                          | SCH0254-116  | unknown    | ΔF508 / unknown   | This study     |
|                                          | SCH0254-118  | unknown    | ΔF508 / unknown   | This study     |
|                                          | SCH0256-1    | sputum     | ΔF508 / ΔF508     | This study     |
|                                          | SCH0338-38   | sputum     | unknown / unknown | This study     |
|                                          | SCH0354-1    | sputum     | ΔF508 / G551D     | This study     |
|                                          | SCH0397-3    | unknown    | ΔF508 / unknown   | This study     |
|                                          | SCH03269     | sputum     | ΔF508 / ΔF508     | This study     |
| <i>Upstate University Hospital (UUH)</i> |              |            |                   |                |
|                                          | UUH0101      | sputum     | ΔF508 / unknown   | This study     |
|                                          | UUH0201      | sputum     | ΔF508 / ΔF508     | This study     |
|                                          | UUH0202      | sputum     | ΔF508 / ΔF508     | This study     |

452

453

454 **References:**

- 455 1. Centers for Disease C, Prevention. 2013. Vital signs: carbapenem-resistant  
456 Enterobacteriaceae. MMWR Morb Mortal Wkly Rep 62:165-70.
- 457 2. Cohen ML. 2000. Changing patterns of infectious disease. Nature 406:762-7.
- 458 3. Freire-Moran L, Aronsson B, Manz C, Gyssens IC, So AD, Monnet DL, Cars O,  
459 Group E-EW. 2011. Critical shortage of new antibiotics in development against  
460 multidrug-resistant bacteria-Time to react is now. Drug Resist Updat 14:118-24.
- 461 4. Lyczak JB, Cannon CL, Pier GB. 2000. Establishment of *Pseudomonas*  
462 *aeruginosa* infection: lessons from a versatile opportunist. Microbes Infect  
463 2:1051-60.
- 464 5. Bodey GP, Bolivar R, Fainstein V, Jadeja L. 1983. Infections caused by  
465 *Pseudomonas aeruginosa*. Rev Infect Dis 5:279-313.
- 466 6. Davis PB, Drumm M, Konstan MW. 1996. Cystic fibrosis. Am J Respir Crit Care  
467 Med 154:1229-56.
- 468 7. Emerson J, Rosenfeld M, McNamara S, Ramsey B, Gibson RL. 2002.  
469 *Pseudomonas aeruginosa* and other predictors of mortality and morbidity in  
470 young children with cystic fibrosis. Pediatr Pulmonol 34:91-100.
- 471 8. Ahlgren HG, Benedetti A, Landry JS, Bernier J, Matouk E, Radzioch D, Lands  
472 LC, Rousseau S, Nguyen D. 2015. Clinical outcomes associated with  
473 *Staphylococcus aureus* and *Pseudomonas aeruginosa* airway infections in adult  
474 cystic fibrosis patients. BMC Pulm Med 15:67.
- 475 9. Govan JR, Deretic V. 1996. Microbial pathogenesis in cystic fibrosis: mucoid  
476 *Pseudomonas aeruginosa* and *Burkholderia cepacia*. Microbiol Rev 60:539-74.

- 477 10. Sanders DB, Fink AK. 2016. Background and Epidemiology. *Pediatr Clin North*  
478 *Am* 63:567-84.
- 479 11. Hoiby N. 2002. Understanding bacterial biofilms in patients with cystic fibrosis:  
480 current and innovative approaches to potential therapies. *J Cyst Fibros* 1:249-54.
- 481 12. Fegan M, Francis P, Hayward AC, Davis GH, Fuerst JA. 1990. Phenotypic  
482 conversion of *Pseudomonas aeruginosa* in cystic fibrosis. *J Clin Microbiol*  
483 28:1143-6.
- 484 13. Lam J, Chan R, Lam K, Costerton J. 1980. Production of mucoid microcolonies  
485 by *Pseudomonas aeruginosa* within infected lungs in cystic fibrosis. *Infection and*  
486 *immunity* 28:546-556.
- 487 14. Registry CFFP. 2016. 2015 Annual Data Report. Cystic Fibrosis Foundation,  
488 Bethesda, Maryland.
- 489 15. Hancock RE, Speert DP. 2000. Antibiotic resistance in *Pseudomonas*  
490 *aeruginosa*: mechanisms and impact on treatment. *Drug Resist Updat* 3:247-255.
- 491 16. Porrás-Gómez M, Vega-Baudrit J. 2012. Overview of multidrug-resistant  
492 *Pseudomonas aeruginosa* and novel therapeutic approaches. *Journal of*  
493 *Biomaterials and Nanobiotechnology* 3:519.
- 494 17. Riou M, Avrain L, Carbonnelle S, El Garch F, Pirnay JP, De Vos D, Plesiat P,  
495 Tulkens PM, Van Bambeke F. 2016. Increase of efflux-mediated resistance in  
496 *Pseudomonas aeruginosa* during antibiotic treatment in patients suffering from  
497 nosocomial pneumonia. *Int J Antimicrob Agents* 47:77-83.

- 498 18. Dickey SW, Cheung GYC, Otto M. 2017. Different drugs for bad bugs:  
499 antivirulence strategies in the age of antibiotic resistance. *Nat Rev Drug Discov*  
500 doi:10.1038/nrd.2017.23.
- 501 19. Wagner S, Sommer R, Hinsberger S, Lu C, Hartmann RW, Empting M, Titz A.  
502 2016. Novel Strategies for the Treatment of *Pseudomonas aeruginosa* Infections.  
503 *J Med Chem* 59:5929-69.
- 504 20. Poole K, Srikumar R. 2001. Multidrug efflux in *Pseudomonas aeruginosa*:  
505 components, mechanisms and clinical significance. *Curr Top Med Chem* 1:59-71.
- 506 21. Stempel N, Strehmel J, Overhage J. 2015. Potential application of antimicrobial  
507 peptides in the treatment of bacterial biofilm infections. *Current pharmaceutical*  
508 *design* 21:67-84.
- 509 22. Park S-C, Park Y, Hahm K-S. 2011. The role of antimicrobial peptides in  
510 preventing multidrug-resistant bacterial infections and biofilm formation.  
511 *International journal of molecular sciences* 12:5971-5992.
- 512 23. Jakobsen TH, Bjarnsholt T, Jensen PO, Givskov M, Hoiby N. 2013. Targeting  
513 quorum sensing in *Pseudomonas aeruginosa* biofilms: current and emerging  
514 inhibitors. *Future Microbiol* 8:901-21.
- 515 24. Smith DJ, Lamont IL, Anderson GJ, Reid DW. 2013. Targeting iron uptake to  
516 control *Pseudomonas aeruginosa* infections in cystic fibrosis. *Eur Respir J*  
517 42:1723-36.
- 518 25. Rogers GB, Carroll MP, Bruce KD. 2012. Enhancing the utility of existing  
519 antibiotics by targeting bacterial behaviour? *Br J Pharmacol* 165:845-57.

- 520 26. Gellatly SL, Hancock RE. 2013. *Pseudomonas aeruginosa*: new insights into  
521 pathogenesis and host defenses. *Pathog Dis* 67:159-73.
- 522 27. Balasubramanian D, Schneper L, Kumari H, Mathee K. 2013. A dynamic and  
523 intricate regulatory network determines *Pseudomonas aeruginosa* virulence.  
524 *Nucleic Acids Res* 41:1-20.
- 525 28. Potvin E, Sanschagrín F, Levesque RC. 2008. Sigma factors in *Pseudomonas*  
526 *aeruginosa*. *FEMS Microbiol Rev* 32:38-55.
- 527 29. Totten PA, Lara JC, Lory S. 1990. The *rpoN* gene product of *Pseudomonas*  
528 *aeruginosa* is required for expression of diverse genes, including the flagellin  
529 gene. *J Bacteriol* 172:389-96.
- 530 30. Damron FH, Owings JP, Okkotsu Y, Varga JJ, Schurr JR, Goldberg JB, Schurr  
531 MJ, Yu HD. 2012. Analysis of the *Pseudomonas aeruginosa* regulon controlled  
532 by the sensor kinase KinB and sigma factor RpoN. *J Bacteriol* 194:1317-30.
- 533 31. Heurlier K, Denervaud V, Pessi G, Reimann C, Haas D. 2003. Negative control  
534 of quorum sensing by RpoN (sigma54) in *Pseudomonas aeruginosa* PAO1. *J*  
535 *Bacteriol* 185:2227-35.
- 536 32. Thompson LS, Webb JS, Rice SA, Kjelleberg S. 2003. The alternative sigma  
537 factor RpoN regulates the quorum sensing gene *rhlI* in *Pseudomonas*  
538 *aeruginosa*. *FEMS Microbiol Lett* 220:187-95.
- 539 33. Caiazza NC, O'Toole GA. 2004. SadB is required for the transition from  
540 reversible to irreversible attachment during biofilm formation by *Pseudomonas*  
541 *aeruginosa* PA14. *J Bacteriol* 186:4476-85.

- 542 34. Viducic D, Murakami K, Amoh T, Ono T, Miyake Y. 2017. RpoN Promotes  
543 *Pseudomonas aeruginosa* Survival in the Presence of Tobramycin. Front  
544 Microbiol 8:839.
- 545 35. Viducic D, Murakami K, Amoh T, Ono T, Miyake Y. 2016. RpoN Modulates  
546 Carbapenem Tolerance in *Pseudomonas aeruginosa* through Pseudomonas  
547 Quinolone Signal and PqsE. Antimicrob Agents Chemother 60:5752-64.
- 548 36. Viducic D, Ono T, Murakami K, Katakami M, Susilowati H, Miyake Y. 2007. *rpoN*  
549 gene of *Pseudomonas aeruginosa* alters its susceptibility to quinolones and  
550 carbapenems. Antimicrob Agents Chemother 51:1455-62.
- 551 37. Schulz S, Eckweiler D, Bielecka A, Nicolai T, Franke R, Dotsch A, Hornischer K,  
552 Bruchmann S, Duvel J, Haussler S. 2015. Elucidation of sigma factor-associated  
553 networks in *Pseudomonas aeruginosa* reveals a modular architecture with limited  
554 and function-specific crosstalk. PLoS Pathog 11:e1004744.
- 555 38. Lloyd MG, Lundgren BR, Hall CW, Gagnon LB-P, Mah T-F, Moffat JF, Nomura  
556 CT. 2017. Targeting the alternative sigma factor RpoN to combat virulence in  
557 *Pseudomonas aeruginosa*. Scientific Reports 7.
- 558 39. Clark ST, Diaz Caballero J, Cheang M, Coburn B, Wang PW, Donaldson SL,  
559 Zhang Y, Liu M, Keshavjee S, Yau YC, Waters VJ, Elizabeth Tullis D, Guttman  
560 DS, Hwang DM. 2015. Phenotypic diversity within a *Pseudomonas aeruginosa*  
561 population infecting an adult with cystic fibrosis. Sci Rep 5:10932.
- 562 40. Duong J, Booth SC, McCartney NK, Rabin HR, Parkins MD, Storey DG. 2015.  
563 Phenotypic and Genotypic Comparison of Epidemic and Non-Epidemic Strains of

- 564 *Pseudomonas aeruginosa* from Individuals with Cystic Fibrosis. PLoS One  
565 10:e0143466.
- 566 41. Smith EE, Buckley DG, Wu Z, Saenphimmachak C, Hoffman LR, D'Argenio DA,  
567 Miller SI, Ramsey BW, Speert DP, Moskowitz SM, Burns JL, Kaul R, Olson MV.  
568 2006. Genetic adaptation by *Pseudomonas aeruginosa* to the airways of cystic  
569 fibrosis patients. Proc Natl Acad Sci U S A 103:8487-92.
- 570 42. Mahenthiralingam E, Campbell ME, Speert DP. 1994. Nonmotility and phagocytic  
571 resistance of *Pseudomonas aeruginosa* isolates from chronically colonized  
572 patients with cystic fibrosis. Infect Immun 62:596-605.
- 573 43. Winstanley C, O'Brien S, Brockhurst MA. 2016. *Pseudomonas aeruginosa*  
574 Evolutionary Adaptation and Diversification in Cystic Fibrosis Chronic Lung  
575 Infections. Trends Microbiol 24:327-37.
- 576 44. Darby C, Cosma CL, Thomas JH, Manoil C. 1999. Lethal paralysis of  
577 *Caenorhabditis elegans* by *Pseudomonas aeruginosa*. Proc Natl Acad Sci U S A  
578 96:15202-7.
- 579 45. Gallagher LA, Manoil C. 2001. *Pseudomonas aeruginosa* PAO1 kills  
580 *Caenorhabditis elegans* by cyanide poisoning. J Bacteriol 183:6207-14.
- 581 46. Tan MW, Rahme LG, Sternberg JA, Tompkins RG, Ausubel FM. 1999.  
582 *Pseudomonas aeruginosa* killing of *Caenorhabditis elegans* used to identify *P.*  
583 *aeruginosa* virulence factors. Proc Natl Acad Sci U S A 96:2408-13.
- 584 47. Mustafa MH, Chalhoub H, Denis O, Deplano A, Vergison A, Rodriguez-Villalobos  
585 H, Tunney MM, Elborn JS, Kahl BC, Traore H, Vanderbist F, Tulkens PM, Van  
586 Bambeke F. 2016. Antimicrobial Susceptibility of *Pseudomonas aeruginosa*

- 587 Isolated from Cystic Fibrosis Patients in Northern Europe. Antimicrob Agents  
588 Chemother 60:6735-6741.
- 589 48. Hill D, Rose B, Pajkos A, Robinson M, Bye P, Bell S, Elkins M, Thompson B,  
590 Macleod C, Aaron SD, Harbour C. 2005. Antibiotic susceptibilities of  
591 *Pseudomonas aeruginosa* isolates derived from patients with cystic fibrosis  
592 under aerobic, anaerobic, and biofilm conditions. J Clin Microbiol 43:5085-90.
- 593 49. Tomas M, Doumith M, Warner M, Turton JF, Beceiro A, Bou G, Livermore DM,  
594 Woodford N. 2010. Efflux pumps, OprD porin, AmpC beta-lactamase, and  
595 multiresistance in *Pseudomonas aeruginosa* isolates from cystic fibrosis patients.  
596 Antimicrob Agents Chemother 54:2219-24.
- 597 50. Mayer-Hamblett N, Rosenfeld M, Gibson RL, Ramsey BW, Kulasekara HD,  
598 Retsch-Bogart GZ, Morgan W, Wolter DJ, Pope CE, Houston LS, Kulasekara  
599 BR, Khan U, Burns JL, Miller SI, Hoffman LR. 2014. *Pseudomonas aeruginosa* in  
600 *in vitro* phenotypes distinguish cystic fibrosis infection stages and outcomes. Am J  
601 Respir Crit Care Med 190:289-97.
- 602 51. O'Reilly LP, Luke CJ, Perlmutter DH, Silverman GA, Pak SC. 2014. *C. elegans* in  
603 high-throughput drug discovery. Adv Drug Deliv Rev 69-70:247-53.
- 604 52. Silver LL. 2011. Challenges of antibacterial discovery. Clin Microbiol Rev 24:71-  
605 109.
- 606 53. Wood WB. 1988. The Nematode *Caenorhabditis elegans*: Introduction to *C.*  
607 *elegans* biology. Cold Spring Harbor Laboratory Press, Cold Spring Harbor, New  
608 York.



- 609 54. Lionaki E, Tavernarakis N. 2013. Assessing aging and senescent decline in  
610 *Caenorhabditis elegans*: cohort survival analysis. *Methods Mol Biol* 965:473-84.
- 611 55. Choi KH, Kumar A, Schweizer HP. 2006. A 10-min method for preparation of  
612 highly electrocompetent *Pseudomonas aeruginosa* cells: application for DNA  
613 fragment transfer between chromosomes and plasmid transformation. *J Microbiol*  
614 *Methods* 64:391-7.
- 615 56. O'Toole GA, Pratt LA, Watnick PI, Newman DK, Weaver VB, Kolter R. 1999.  
616 Genetic approaches to study of biofilms. *Methods Enzymol* 310:91-109.
- 617 57. O'Toole GA. 2011. Microtiter dish biofilm formation assay. *J Vis Exp*  
618 doi:10.3791/2437.
- 619 58. Tan MW, Mahajan-Miklos S, Ausubel FM. 1999. Killing of *Caenorhabditis*  
620 *elegans* by *Pseudomonas aeruginosa* used to model mammalian bacterial  
621 pathogenesis. *Proc Natl Acad Sci U S A* 96:715-20.
- 622
